# Supplementary material
Source: PubMed Central journal article supplement (PMC6575597)
Supplement: pnas.1900365116.sapp.pdf [file pnas.1900365116.sapp.pdf]

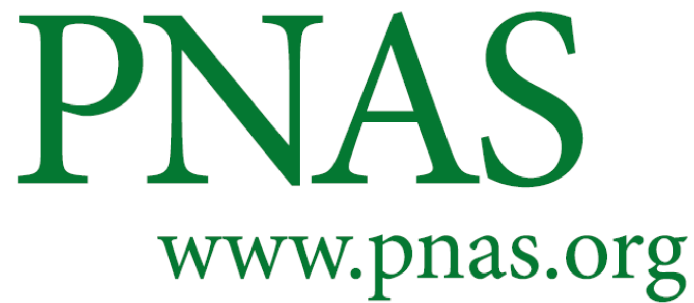

## Supplementary Information for

A homeotic shift late in development drives mimetic color variation in a bumble bee

Li Tian, Sarthok Rasique Rahman, Briana D. Ezray, Luca Franzini, James P. Strange, Patrick Lhomme, Heather M. Hines

Heather M. Hines  
Email: [hmh19@psu.edu](mailto:hmh19@psu.edu).

### **This PDF file includes:**

Figs. S1 to S5  
Tables S1 to S4  
References for SI reference citations

## SI Figures

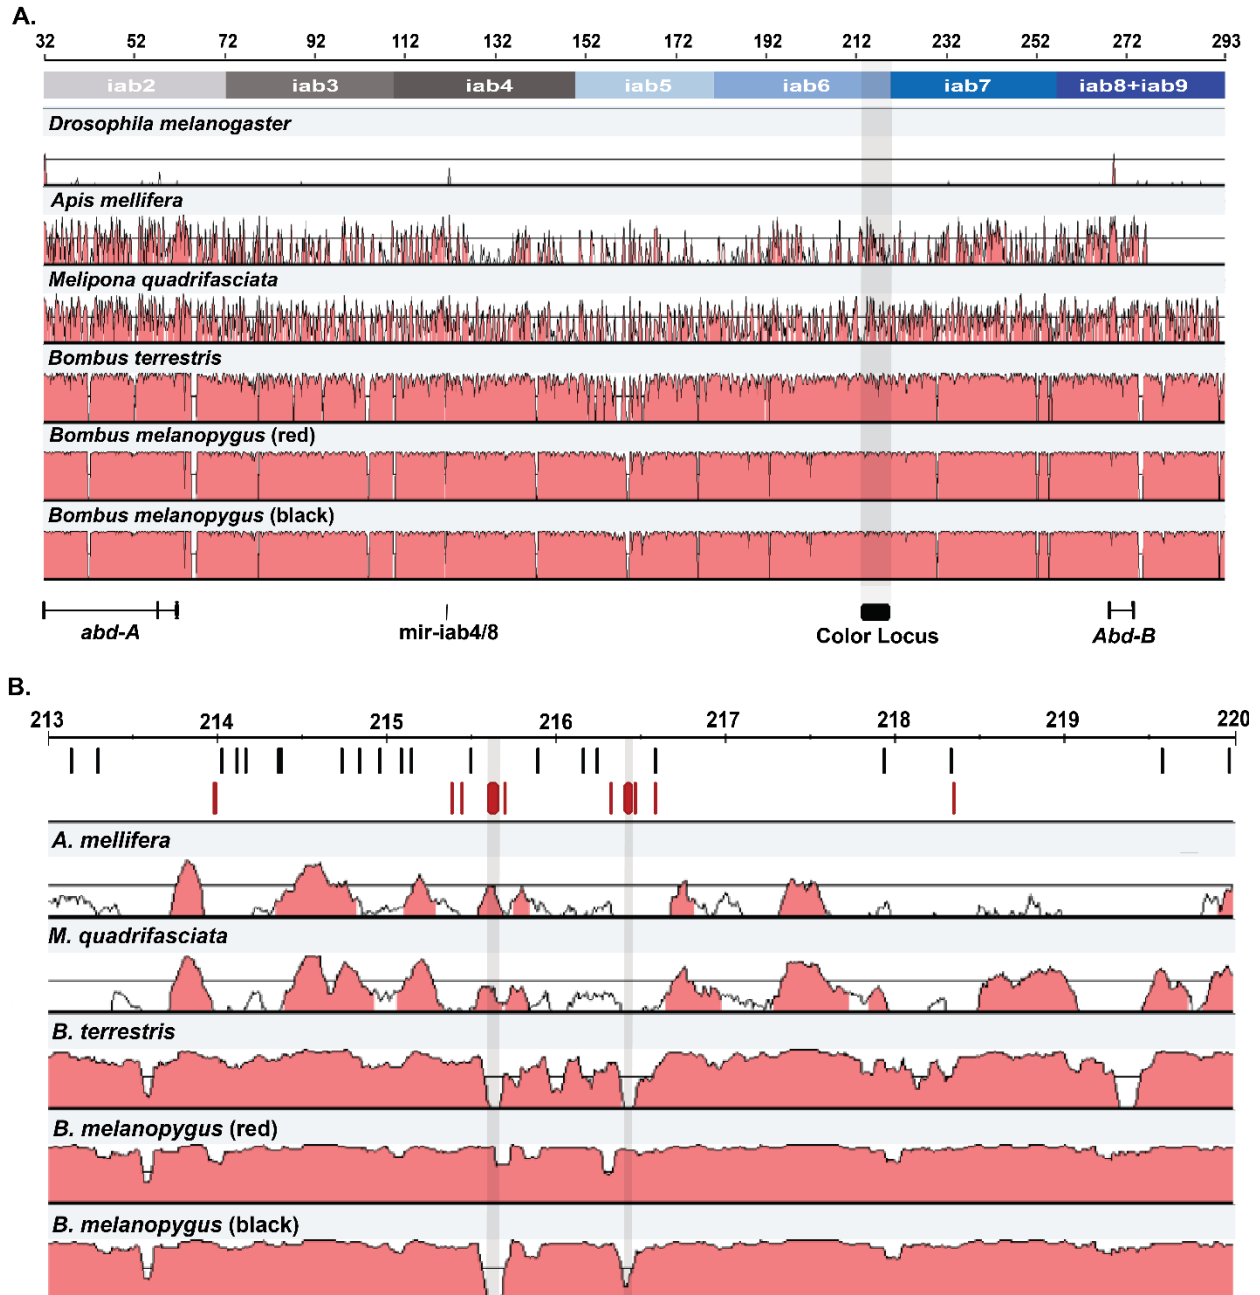

**Fig. S1. Sequence conservation plot across the *abdominal-A/B* intergenic region (A) and in an ~7 kb region including the narrowed fixed color interval (B).** Sequences are compared to reference contig BIMP 2.0 NT177935.1 from *Bombus impatiens* (1). The height of m-VISTA plots indicates the amount of sequence conservation which was calculated using a 100 bp sliding window (Minimum Y = 50%, Maximum Y= 100%, Minimum percent conservation identity = 70%, minimum width of a conservation region = 100bp, RankVISTA probability threshold set to 0.5). In (A), the position of the microRNA, *abd-A*, and *Abd-B* CDS are shown at the bottom, as

well as the approximated positions of *iab* domains at top (2), determined based on relative distances of these regions from these three aligned genes in *Drosophila melanogaster*. The position of the color locus relative to these is highlighted in gray. In (B), the positions of SNPs (top row, black) and indels (bottom row, red) relative to conserved regions are indicated. Genomic sequences used for the conservation plots were obtained from NCBI for *Drosophila melanogaster* (RefSeq assembly accession: GCF\_000001215.4, RefSeq sequence accession: NT\_033777.3), *Apis mellifera* (GenBank assembly accession: GCA\_000002195.1, GenBank sequence accession: CM000069.5), *Melipona quadrifasciata* (GenBank assembly accession: GCA\_001276565.1, GenBank sequence accession: KQ435720.1), *Bombus terrestris* (GenBank assembly accession: GCA\_000214255.1, GenBank sequence accession: CM001186.1) and *Bombus impatiens* (RefSeq assembly accession: GCF\_000188095.1, RefSeq sequence accession: NT\_177925.1) which was used as the reference sequence. *Bombus melanopygus* sequences were *de novo* assembled from Bme004 (black form) and R007 (red form). Sequence files (in FASTA format) are provided in the Dryad Digital Repository (3).

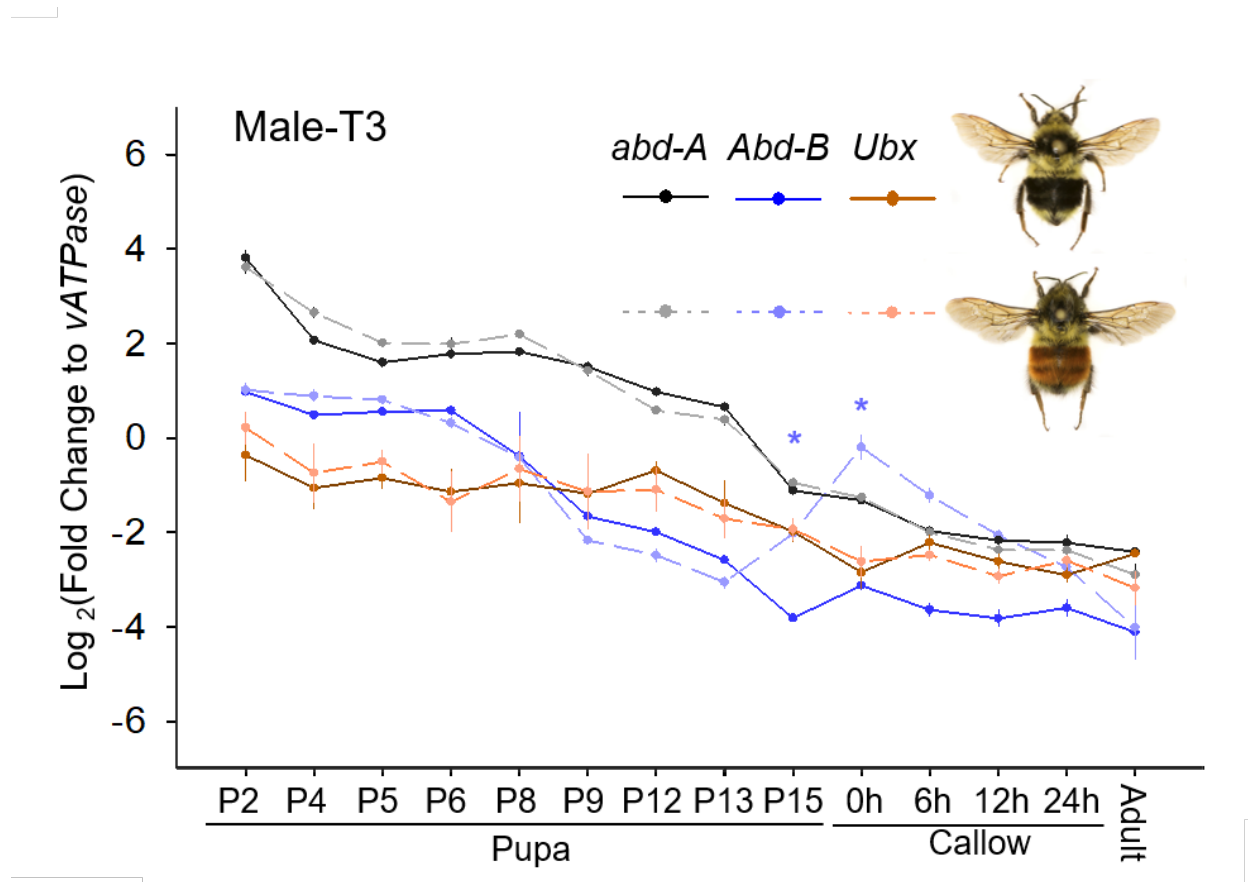

**Fig. S2. BX-C expression differences in *B. melanopygus* males are consistent across polymorphic segments.** A similar homeotic shift of *Abd-B* in the red form to that presented in Fig. 3C is also observed in metasomal tergite segment T3 of *B. melanopygus* males. \* $p < 0.01$ , Mann-Whitney *U* test.

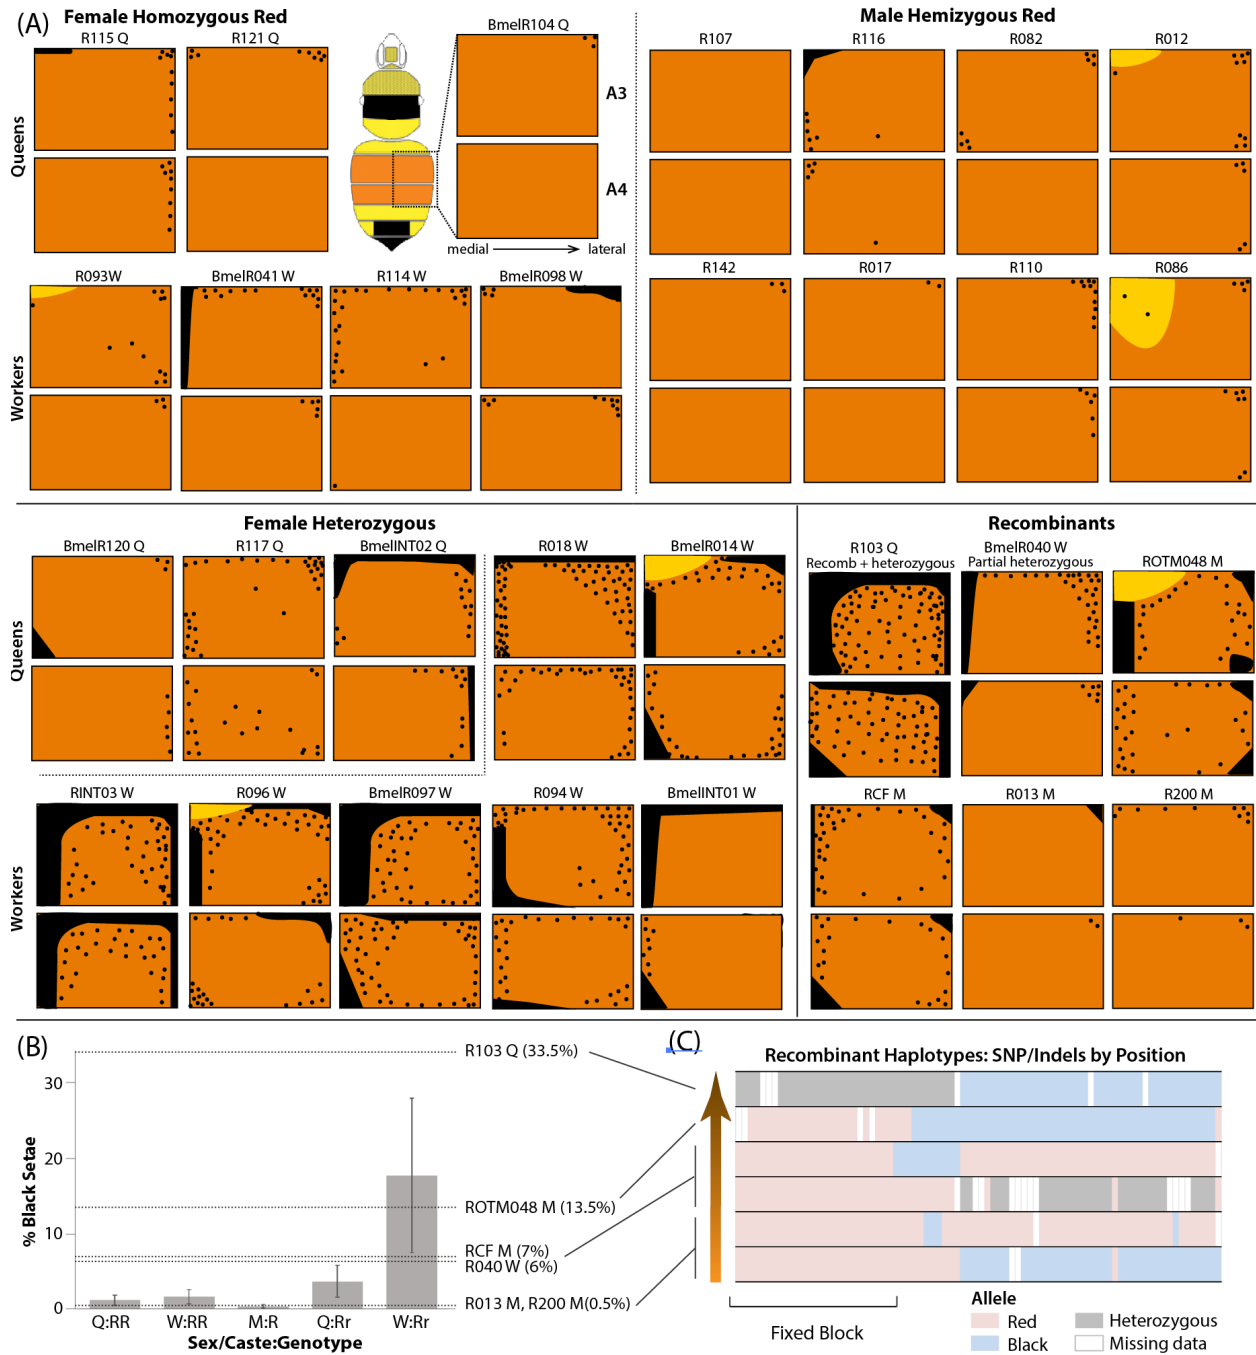

**Fig. S3. Color phenotypes by genotype in the color locus.** (A) Queens, workers, and males of homozygous/hemizygous red individual phenotypes are compared to those that are heterozygous at the color locus, with genotypes determined through sequencing of the color locus. Depictions show amount of black hairs on orange-red with dots representing individual hairs and blocks of black indicating regions with exclusively black hairs, assessed using drawings from microscope observations. Yellow indicates yellow hairs contained within an arch for some individuals. The 2nd and 3rd metasomal segment (T2, T3) for each individual is shown for one side of the body only, with medial regions on the left. Black patterning tended to be symmetrical. (B) Plot of the

average percent of black pile across both segments per condition, with standard error indicated. Dashed lines denote the percent of black hairs for each recombinant individual. Percentages were obtained using the Blur: Average function in Photoshop for the diagrams and obtaining relative brightness levels of the averaged color to the pure orange color. These values were averaged across both segments for each individual and converted to percent black using percent decrease in brightness. Means with the same letter are not significantly different (Kruskal-Wallis One-Way followed by Dunn's post-hoc test,  $\alpha=0.05$ ). (C) Allelic designation for each recombinant individual from Part A and B. Each box represents a fixed SNP or indel between red and black form in the genomic dataset by location, with colors in boxes representing the color form the allele is assigned to in the genomic analysis.

Workers tend to have more mixing of black both in homozygous individuals and in the heterozygous form than males and queens, in line with the reduced expression in workers compared to males of *Abd-B* during periods of differential expression. Female heterozygotes display increased black above homozygotes (10-fold for workers, 3-fold for queens). Paired Mann-Whitney two sample tests indicated these differences to be significant in workers ( $p=0.003$ ) but not queens ( $p=0.385$ ), supporting incomplete dominance of the phenotype. These data also support the importance of SNPs outside of the fixed block for reinforcing the phenotype. Although all sampled individuals are still majority red, some recombinant individuals have substantial mixing of black similar to what is seen in heterozygous workers, suggesting these SNPs help to strengthen the expression phenotype. The region immediately adjacent to the fixed interval appears to be most important to the phenotype as seen in increased black with ROTM048 and RCF but not R013. The increased black in R040, which has heterozygosity in the non-fixed end of the interval only, upon what is typically found in a homozygous worker, suggests that some of the SNPs in this region are likely reinforcing the phenotype as well. R040 has an intermediate level between a homozygote and heterozygote. R103 is both recombinant and heterozygous and has the most black of any of the individuals, further supporting that SNPs across this interval are important for the phenotype.

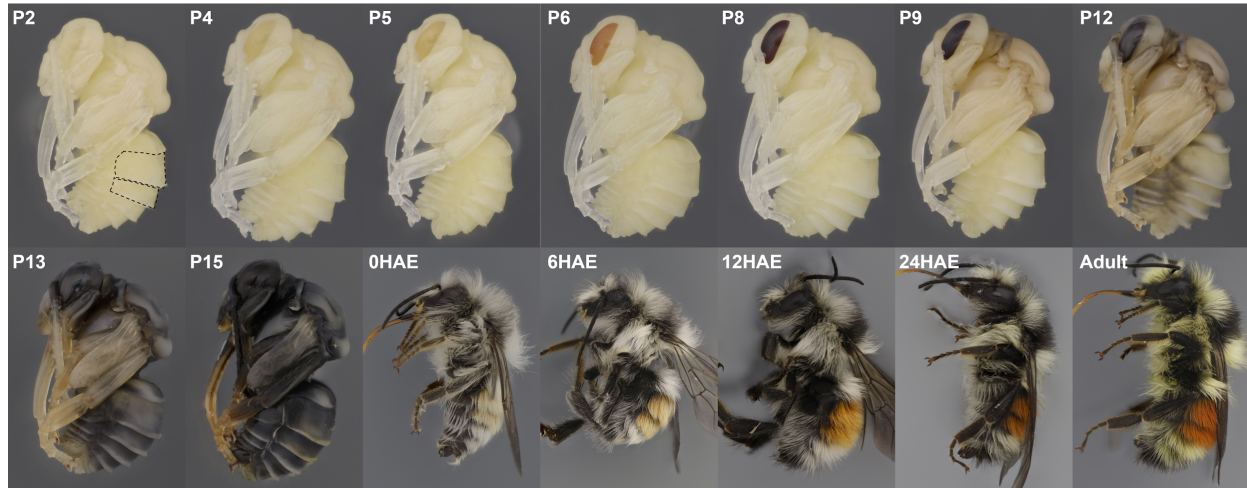

**Fig. S4. *B. melanopygus* pupal and early adult stages used for gene expression analysis.** Male bees are shown. For callow adults, only red form bees are shown. The polymorphic tergites of metasomal T2 and T3 (dashed line on P2) were dissected and used for qPCR. The average time between each pupal stage is 12-24 hours (4). HAE: Hours after eclosion from cocoon. Adult: 3-days after eclosion.

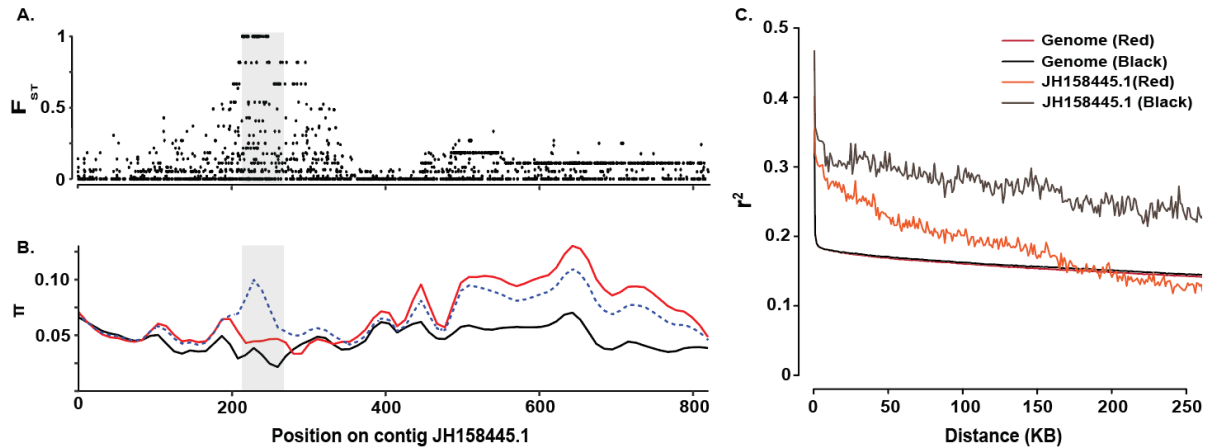

**Fig. S5. Population genetic statistics in the interval and genome.** (A). Genetic differentiation ( $F_{ST}$ ) and (B) per site nucleotide diversity ( $\pi$ ) in the color locus contig JH158445.1 calculated from genomic sequences of red and black phenotypes. The highlighted areas (light grayscale box) represent the location of the genomic fixed block. In (B), black (black solid line) and red (red solid line) forms exhibit reduced nucleotide diversity in the color interval within populations but high nucleotide diversity in combination (blue dashed line), as may be expected given their nucleotide divergence. (C). Linkage Disequilibrium (LD) decay in the color contig and the whole genome minus the color locus contig for red and black phenotypes where  $r^2$  measurements of Linkage Disequilibrium values were plotted against the genetic distances (kilobases) between SNPs. While black phenotypes exhibit higher LD than red ones in the color locus contig JH158445.1, both forms exhibit very similar trends of LD in the rest of the genome. Raw datasets and details of these analyses are provided in the Dryad Digital Repository (3).

## SI Tables

**Table S1. A summary of whole-genome sequencing datasets utilized in the Genome-wide Association Analysis (GWAS)\*.**

| Sample ID          | NCBI BioSample ID | Sequencing Depth (Coverage) | Breadth at 1X (% Genome covered) | Total number of raw reads (M) | Total number of post-QC reads (M) | % reads mapped |
|--------------------|-------------------|-----------------------------|----------------------------------|-------------------------------|-----------------------------------|----------------|
| Bme004             | SAMN11091098      | 17.51                       | 94.32                            | 53.10                         | 36.27                             | 96.85          |
| Bme012             | SAMN11091099      | 16.25                       | 94.02                            | 50.87                         | 36.85                             | 96.36          |
| Bme15              | SAMN11091100      | 14.41                       | 93.85                            | 38.52                         | 30.95                             | 96.25          |
| Bme19              | SAMN11091101      | 16.62                       | 93.96                            | 44.90                         | 36.26                             | 95.99          |
| Bme7               | SAMN11091102      | 6.75                        | 91.29                            | 17.34                         | 14.00                             | 96.06          |
| BmeIB-003          | SAMN11091104      | 7.14                        | 90.63                            | 54.60                         | 16.72                             | 94.27          |
| BmeIB006           | SAMN11091105      | 6.70                        | 89.89                            | 51.53                         | 15.53                             | 94.82          |
| BmeIB1             | SAMN11091106      | 5.51                        | 87.09                            | 25.31                         | 11.19                             | 95.92          |
| BmeIB4             | SAMN11091107      | 5.81                        | 88.47                            | 27.10                         | 12.05                             | 96.81          |
| BmeIR003           | SAMN11091108      | 7.61                        | 90.65                            | 56.03                         | 17.88                             | 94.91          |
| BmeIR004           | SAMN11091109      | 7.24                        | 90.73                            | 52.29                         | 16.85                             | 95.49          |
| BmeIR2             | SAMN11091110      | 7.29                        | 91.12                            | 36.24                         | 15.94                             | 96.20          |
| BmeIR5             | SAMN11091111      | 4.49                        | 81.49                            | 19.76                         | 8.60                              | 96.07          |
| Bme-SIENF01_28_S13 | SAMN11091103      | 15.72                       | 93.90                            | 40.50                         | 33.14                             | 95.92          |
| Bmm035             | SAMN11091112      | 16.16                       | 93.94                            | 49.07                         | 34.06                             | 95.52          |
| Bmm13              | SAMN11091113      | 7.41                        | 91.98                            | 19.73                         | 15.58                             | 95.52          |
| Bmm1               | SAMN11091114      | 14.81                       | 93.88                            | 41.01                         | 32.76                             | 95.82          |
| Bmm37              | SAMN11091115      | 12.62                       | 93.60                            | 34.62                         | 27.21                             | 96.45          |
| Bmm_WA001          | SAMN11091116      | 13.24                       | 89.90                            | 49.77                         | 43.13                             | 95.30          |
| R001               | SAMN11091117      | 20.53                       | 94.12                            | 62.78                         | 43.20                             | 97.00          |
| R007               | SAMN11091118      | 20.47                       | 94.14                            | 63.23                         | 43.17                             | 96.33          |

\*Sequencing depth = average depth of coverage per base of the *Bombus impatiens* genome (249185056 bp, GenBank Assembly GCA\_000188105.2, BIMP\_2.0; (1)), Breadth at 1X = percent of the *B. impatiens* genome with reads mapped. Total number of raw reads = number of paired end reads sequenced (in millions, M). Total number of post-QC reads = number of paired end reads after quality trimming (in millions, M), and % reads mapped = total percent of those reads that mapped to the *B. impatiens* genome. Multi-sample variant calling performed in GATK Unified Genotyper version 3.6 (5) (-ploidy 1 -glm SNP -stand\_call\_conf 25.0) resulted in 6,275,931 SNP calls. SNP filtration in VCFtools 0.1.15 (6) using parameters to filter sites with substantial amount of missing data (--max-missing 0.75) and low variability (max-non-ref-af 0.95) resulted in the 1,574,240 SNPs utilized in genotype-phenotype association analysis.



**Table S2. Specimens sampled for whole genomic sequencing (WGS) and genotyping (GENO) experiments.** Specimens are housed in the laboratory of H. M. Hines (Pennsylvania State University, University Park, PA).

| STUDY | SAMPLE ID               | SPECIES            | T2-T3<br>COLOR | LATITUDE   | LONGITUDE    | COUNTRY:<br>STATE             | DATE<br>COLLECTED | SEX/<br>CASTE |
|-------|-------------------------|--------------------|----------------|------------|--------------|-------------------------------|-------------------|---------------|
| WGS   | BmelB1                  | <i>melanopygus</i> | Black          | 42.1065111 | -124.3466306 | USA: Oregon                   | 2013-06-18        | male          |
| WGS   | BmelB4                  | <i>melanopygus</i> | Black          | 42.3289    | -124.4258611 | USA: Oregon                   | 2013-06-18        | male          |
| WGS   | BmelB-003               | <i>melanopygus</i> | Black          | 42.1065111 | -124.3466306 | USA: Oregon                   | 2013-06-18        | male          |
| WGS   | BmelB006                | <i>melanopygus</i> | Black          | 42.3289    | -124.4258611 | USA: Oregon                   | 2013-06-19        | male          |
| WGS   | Bme004                  | <i>melanopygus</i> | Black          | 43.9561167 | -124.1374444 | USA: Oregon                   | 2014-06-01        | male          |
| WGS   | Bme012                  | <i>melanopygus</i> | Black          | 42.3288278 | -124.4265417 | USA: Oregon                   | 2014-06-04        | male          |
| WGS   | Bme15                   | <i>melanopygus</i> | Black          | 43.9563833 | -124.1371056 | USA: Oregon                   | 2014-06-09        | male          |
| WGS   | Bme19                   | <i>melanopygus</i> | Black          | 44.0518139 | -124.1095361 | USA: Oregon                   | 2014-06-10        | male          |
| WGS   | BmelR2                  | <i>melanopygus</i> | Red            | 42.3289    | -124.4258611 | USA: Oregon                   | 2013-06-18        | male          |
| WGS   | BmelR5                  | <i>melanopygus</i> | Red            | 42.1065111 | -124.3466306 | USA: Oregon                   | 2013-06-18        | male          |
| WGS   | BmelR003                | <i>melanopygus</i> | Red            | 42.3289    | -124.4258611 | USA: Oregon                   | 2013-06-18        | male          |
| WGS   | BmelR004                | <i>melanopygus</i> | Red            | 42.1065111 | -124.3466306 | USA: Oregon                   | 2013-06-18        | male          |
| WGS   | Bmm035                  | <i>melanopygus</i> | Red            | 43.9565444 | -124.1168472 | USA: Oregon                   | 2014-06-09        | male          |
| WGS   | R001                    | <i>melanopygus</i> | Red            | 42.4648389 | -124.3487806 | USA: Oregon                   | 2013-06-19        | male          |
| WGS   | R007                    | <i>melanopygus</i> | Red            | 43.8121667 | -124.1589972 | USA: Oregon                   | 2013-06-15        | male          |
| WGS   | Bmm1                    | <i>melanopygus</i> | Red            | 43.9561167 | -124.1374444 | USA: Oregon                   | 2014-06-01        | male          |
| WGS   | Bmm13                   | <i>melanopygus</i> | Red            | 43.6625278 | -124.1988528 | USA: Oregon                   | 2014-06-02        | male          |
| WGS   | Bmm37                   | <i>melanopygus</i> | Red            | 44.0518139 | -124.1095361 | USA: Oregon                   | 2014-06-09        | male          |
| WGS   | Bmm_WA001               | <i>melanopygus</i> | Red            | 47.017     | -122.9710000 | USA:<br>Washington            | 2013              | male          |
| WGS   | Bme7                    | <i>melanopygus</i> | Black          | 42.1043972 | -124.3469500 | USA: Oregon                   | 2014-06-03        | male          |
| WGS   | Bmel-SIENF01<br>_28_S13 | <i>melanopygus</i> | Black          | 37.4877024 | -119.6235133 | USA:<br>California            | 2017-06-10        | male          |
| GENO  | BmelB002                | <i>melanopygus</i> | Black          | 42.1065111 | -124.3466306 | USA: Oregon                   | 2013-06-18        | male          |
| GENO  | BmelB005                | <i>melanopygus</i> | Black          | 42.3289    | -124.4258611 | USA: Oregon                   | 2013-06-18        | male          |
| GENO  | BmelB020                | <i>melanopygus</i> | Black          | 42.08      | -122.7200000 | USA: Oregon                   | 2015-06-06        | male          |
| GENO  | BmelB021                | <i>melanopygus</i> | Black          | 42         | -122.7700000 | USA:<br>California/<br>Oregon | 2015-07-15        | male          |
| GENO  | BmelB022                | <i>melanopygus</i> | Black          | 43.209836  | -124.3104600 | USA: Oregon                   | 2015-06-07        | male          |
| GENO  | BmelB025                | <i>melanopygus</i> | Black          | 43.9563833 | -124.1371056 | USA: Oregon                   | 2015-03-02        | queen         |
| GENO  | BmelB026                | <i>melanopygus</i> | Black          | 43.209836  | -124.3104600 | USA: Oregon                   | 2015-06-07        | male          |
| GENO  | BmelB027                | <i>melanopygus</i> | Black          | 42.0735861 | -122.6048889 | USA: Oregon                   | 2014-06-07        | worker        |
| GENO  | BmelB028                | <i>melanopygus</i> | Black          | 44.0518139 | -124.1095361 | USA: Oregon                   | 2014-06-10        | male          |
| GENO  | BmelB029                | <i>melanopygus</i> | Black          | 43.9563833 | -124.1371056 | USA: Oregon                   | 2014-06-09        | male          |
| GENO  | BmelB030                | <i>melanopygus</i> | Black          | 42.1063056 | -124.3464917 | USA: Oregon                   | 2014-06-03        | male          |
| GENO  | BmelB031                | <i>melanopygus</i> | Black          | 43.9563833 | -124.1371056 | USA: Oregon                   | 2014-06-01        | male          |
| GENO  | BmelB032                | <i>melanopygus</i> | Black          | 44.0518139 | -124.1095361 | USA: Oregon                   | 2014-06-10        | male          |

| STUDY | SAMPLE ID   | SPECIES            | T2-T3 |            | LONGITUDE    | COUNTRY:           | DATE       | SEX/   |
|-------|-------------|--------------------|-------|------------|--------------|--------------------|------------|--------|
|       |             |                    | COLOR | LATITUDE   |              |                    |            |        |
| GENO  | BmelB034    | <i>melanopygus</i> | Black | 43.956923  | -124.1411510 | USA: Oregon        | 2015-03-02 | queen  |
| GENO  | BmelB036    | <i>melanopygus</i> | Black | 42.3289    | -124.4258611 | USA: Oregon        | 2013-06-19 | male   |
| GENO  | BmelB037    | <i>melanopygus</i> | Black | 42.1065111 | -124.3466306 | USA: Oregon        | 2013-06-18 | male   |
| GENO  | BmelB038    | <i>melanopygus</i> | Black | 40.756594  | -124.1646333 | USA:<br>California | 2015-03-02 | queen  |
| GENO  | BmelB051    | <i>melanopygus</i> | Black | 41.797607  | -124.0818450 | USA: Oregon        | 2015-06-06 | male   |
| GENO  | BmelB053    | <i>melanopygus</i> | Black | 43.9563833 | -124.1371056 | USA: Oregon        | 2014-06-09 | male   |
| GENO  | BmelB054    | <i>melanopygus</i> | Black | 43.9563833 | -124.1371056 | USA: Oregon        | 2014-06-01 | male   |
| GENO  | BmelB055    | <i>melanopygus</i> | Black | 42.1043306 | -124.3465667 | USA: Oregon        | 2014-06-03 | male   |
| GENO  | BmelB056    | <i>melanopygus</i> | Black | 42.1065111 | -124.3466306 | USA: Oregon        | 2013-06-19 | male   |
| GENO  | BmelB057    | <i>melanopygus</i> | Black | 42.1065111 | -124.3466306 | USA: Oregon        | 2013-06-19 | male   |
| GENO  | BmelB058    | <i>melanopygus</i> | Black | 43.9563833 | -124.1371056 | USA: Oregon        | 2014-06-01 | male   |
| GENO  | BmelB059    | <i>melanopygus</i> | Black | 42.1041917 | -124.3457361 | USA: Oregon        | 2014-06-04 | male   |
| GENO  | BmelB060    | <i>melanopygus</i> | Black | 43.9563833 | -124.1371056 | USA: Oregon        | 2014-06-09 | male   |
| GENO  | BmelB061    | <i>melanopygus</i> | Black | 44.0518139 | -124.1095361 | USA: Oregon        | 2014-06-10 | male   |
| GENO  | BmelB062    | <i>melanopygus</i> | Black | 41.34678   | -122.2414300 | USA:<br>California | 2015-07-15 | male   |
| GENO  | BmelB063    | <i>melanopygus</i> | Black | 40.3273    | -123.9254680 | USA:<br>California | 2015-06-05 | male   |
| GENO  | BmelB064    | <i>melanopygus</i> | Black | 41.769369  | -124.1551440 | USA:<br>California | 2015-06-06 | worker |
| GENO  | BmelB066    | <i>melanopygus</i> | Black | 42.1065111 | -124.3466306 | USA: Oregon        | 2013-06-18 | male   |
| GENO  | BmelB067    | <i>melanopygus</i> | Black | 42.1065111 | -124.3466306 | USA: Oregon        | 2013-06-18 | male   |
| GENO  | BmelB068    | <i>melanopygus</i> | Black | 40.3273    | -123.9254680 | USA:<br>California | 2015-06-05 | male   |
| GENO  | BmelB069    | <i>melanopygus</i> | Black | 43.9563833 | -124.1371056 | USA: Oregon        | 2014-06-01 | male   |
| GENO  | BmelB070    | <i>melanopygus</i> | Black | 42.1045972 | -124.3467667 | USA: Oregon        | 2014-06-03 | male   |
| GENO  | BmelB071    | <i>melanopygus</i> | Black | 42.1043972 | -124.3469500 | USA: Oregon        | 2014-06-03 | male   |
| GENO  | BmelB072    | <i>melanopygus</i> | Black | 43.9563833 | -124.1371056 | USA: Oregon        | 2014-06-01 | male   |
| GENO  | BmelB073    | <i>melanopygus</i> | Black | 42.1065111 | -124.3466306 | USA: Oregon        | 2013-06-18 | male   |
| GENO  | BmelB074    | <i>melanopygus</i> | Black | 41.34678   | -122.2414300 | USA:<br>California | 2015-07-15 | male   |
| GENO  | BmelB100    | <i>melanopygus</i> | Black | 42.081689  | -122.706948  | USA: Oregon        | 2016-05-28 | male   |
| GENO  | BmelB101    | <i>melanopygus</i> | Black | 43.036851  | -124.071454  | USA: Oregon        | 2016-05-29 | male   |
| GENO  | BmelB102    | <i>melanopygus</i> | Black | 42.687131  | -124.437234  | USA: Oregon        | 2016-05-25 | male   |
| GENO  | BmelB103    | <i>melanopygus</i> | Black | 41.796994  | -124.0816120 | USA:<br>California | 2016-05-27 | male   |
| GENO  | BmelB202    | <i>melanopygus</i> | Black | 37.3972864 | -119.5954027 | USA:<br>California | 2017-06-10 | worker |
| GENO  | BmelB203    | <i>melanopygus</i> | Black | 36.1363782 | -118.5407347 | USA:<br>California | 2017-06-24 | male   |
| GENO  | BmelBOTM043 | <i>melanopygus</i> | Black | 42.0649176 | -124.3026239 | USA: Oregon        | 2016-05-27 | male   |
| GENO  | BmelBOTM045 | <i>melanopygus</i> | Black | 41.1782051 | -124.07747   | USA:<br>California | 2016-05-26 | male   |
| GENO  | BmelBOTM047 | <i>melanopygus</i> | Black | 41.2215212 | -124.0931031 | USA:<br>California | 2016-05-26 | male   |

| STUDY | SAMPLE ID   | SPECIES            | T2-T3 |            | LONGITUDE    | COUNTRY:    | DATE       | SEX/   |
|-------|-------------|--------------------|-------|------------|--------------|-------------|------------|--------|
|       |             |                    | COLOR | LATITUDE   |              |             |            |        |
| GENO  | BmelBOTM049 | <i>melanopygus</i> | Black | 42.100447  | -124.3470295 | USA: Oregon | 2016-05-27 | male   |
| GENO  | BmelBOTM050 | <i>melanopygus</i> | Black | 42.687131  | -124.437234  | USA: Oregon | 2016-05-25 | male   |
| GENO  | BmelBOTM051 | <i>melanopygus</i> | Black | 42.2847724 | -124.4070977 | USA: Oregon | 2016-05-25 | male   |
| GENO  | BmelBOTM061 | <i>melanopygus</i> | Black | 42.687131  | -124.437234  | USA: Oregon | 2016-05-25 | male   |
| GENO  | BmelBOTM111 | <i>melanopygus</i> | Red   | 42.081689  | -122.706948  | USA: Oregon | 2016-05-28 | male   |
| GENO  | BmelBOTM115 | <i>melanopygus</i> | Black | 42.081689  | -122.706948  | USA: Oregon | 2016-05-28 | male   |
| GENO  | Bmel_RCF    | <i>melanopygus</i> | Red   | 42.1065111 | -124.3466306 | USA: Oregon | 2016-05-25 | male   |
| GENO  | Bmel_RCP    | <i>melanopygus</i> | Red   | 44.1726266 | -122.9500286 | USA: Oregon | 2016-05-24 | male   |
| GENO  | Bmel_RPRL   | <i>melanopygus</i> | Red   | 42.2847724 | -124.4070977 | USA: Oregon | 2016-05-25 | male   |
| GENO  | BmelB023    | <i>melanopygus</i> | Red   | 43.9563833 | -124.1371056 | USA: Oregon | 2014-06-08 | male   |
| GENO  | BmelB033    | <i>melanopygus</i> | Red   | 44.0518139 | -124.1095361 | USA: Oregon | 2014-06-10 | male   |
| GENO  | BmelR010    | <i>melanopygus</i> | Red   | 45.30289   | -121.7936800 | USA: Oregon | 2015-07-18 | male   |
| GENO  | BmelR011    | <i>melanopygus</i> | Red   | 44.79286   | -121.8378600 | USA: Oregon | 2015-07-17 | male   |
| GENO  | BmelR012    | <i>melanopygus</i> | Red   | 43.209836  | -124.3104600 | USA: Oregon | 2015-06-07 | male   |
| GENO  | BmelR013    | <i>melanopygus</i> | Red   | 42.3289    | -124.4258611 | USA: Oregon | 2013-06-19 | male   |
| GENO  | BmelR014    | <i>melanopygus</i> | Red   | 42.0735861 | -122.6048889 | USA: Oregon | 2014-06-07 | worker |
| GENO  | BmelR015    | <i>melanopygus</i> | Red   | 44.0435583 | -124.0991028 | USA: Oregon | 2014-06-08 | male   |
| GENO  | BmelR016    | <i>melanopygus</i> | Red   | 42.3286083 | -124.4280056 | USA: Oregon | 2014-06-04 | male   |
| GENO  | BmelR017    | <i>melanopygus</i> | Red   | 43.6582111 | -124.1886111 | USA: Oregon | 2013-06-19 | male   |
| GENO  | BmelR018    | <i>melanopygus</i> | Red   | 42.1043306 | -124.3465667 | USA: Oregon | 2014-06-03 | worker |
| GENO  | BmelR019    | <i>melanopygus</i> | Red   | 43.9561167 | -124.1374444 | USA: Oregon | 2014-06-01 | male   |
| GENO  | BmelR040    | <i>melanopygus</i> | Red   | 44.504979  | -123.5510790 | USA: Oregon | 2015-06-10 | worker |
| GENO  | BmelR041    | <i>melanopygus</i> | Red   | 43.797869  | -124.1479150 | USA: Oregon | 2015-06-07 | worker |
| GENO  | BmelR042    | <i>melanopygus</i> | Red   | 42.3289    | -124.4258611 | USA: Oregon | 2013-06-19 | male   |
| GENO  | BmelR043    | <i>melanopygus</i> | Red   | 42.1065111 | -124.3466306 | USA: Oregon | 2013-06-17 | male   |
| GENO  | BmelR044    | <i>melanopygus</i> | Red   | 42.1043306 | -124.3465667 | USA: Oregon | 2014-06-03 | male   |
| GENO  | BmelR045    | <i>melanopygus</i> | Red   | 42.3288028 | -124.4284667 | USA: Oregon | 2014-06-04 | male   |
| GENO  | BmelR080    | <i>melanopygus</i> | Red   | 43.9561167 | -124.1374444 | USA: Oregon | 2014-06-01 | male   |
| GENO  | BmelR081    | <i>melanopygus</i> | Red   | 43.9561167 | -124.1374444 | USA: Oregon | 2014-06-01 | male   |
| GENO  | BmelR082    | <i>melanopygus</i> | Red   | 43.9563833 | -124.1371056 | USA: Oregon | 2014-06-01 | male   |
| GENO  | BmelR083    | <i>melanopygus</i> | Red   | 43.9563833 | -124.1371056 | USA: Oregon | 2014-06-01 | male   |
| GENO  | BmelR084    | <i>melanopygus</i> | Red   | 42.1065556 | -124.3464944 | USA: Oregon | 2014-06-03 | male   |
| GENO  | BmelR085    | <i>melanopygus</i> | Red   | 44.0435583 | -124.0991028 | USA: Oregon | 2014-06-08 | male   |
| GENO  | BmelR086    | <i>melanopygus</i> | Red   | 44.0435583 | -124.0991028 | USA: Oregon | 2014-06-08 | male   |
| GENO  | BmelR087    | <i>melanopygus</i> | Red   | 44.0518139 | -124.1095361 | USA: Oregon | 2014-06-09 | male   |
| GENO  | BmelR088    | <i>melanopygus</i> | Red   | 43.9563833 | -124.1371056 | USA: Oregon | 2014-06-09 | male   |
| GENO  | BmelR089    | <i>melanopygus</i> | Red   | 43.8121667 | -124.1589972 | USA: Oregon | 2013-06-15 | male   |
| GENO  | BmelR090    | <i>melanopygus</i> | Red   | 43.6741    | -124.1676194 | USA: Oregon | 2013-06-15 | male   |
| GENO  | BmelR091    | <i>melanopygus</i> | Red   | 42.1065111 | -124.3466306 | USA: Oregon | 2013-06-17 | male   |

| STUDY | SAMPLE ID  | SPECIES            | T2-T3 |            | LONGITUDE    | COUNTRY:           | DATE       | SEX/   |
|-------|------------|--------------------|-------|------------|--------------|--------------------|------------|--------|
|       |            |                    | COLOR | LATITUDE   |              |                    |            |        |
| GENO  | BmelR092   | <i>melanopygus</i> | Red   | 43.6582111 | -124.1886111 | USA: Oregon        | 2013-06-19 | male   |
| GENO  | BmelR093   | <i>melanopygus</i> | Red   | 43.209836  | -124.3104600 | USA: Oregon        | 2015-06-07 | worker |
| GENO  | BmelR094   | <i>melanopygus</i> | Red   | 44.504979  | -123.5510790 | USA: Oregon        | 2015-06-10 | worker |
| GENO  | BmelR095   | <i>melanopygus</i> | Red   | 45.503753  | -122.6842700 | USA: Oregon        | 2015-06-11 | male   |
| GENO  | BmelR096   | <i>melanopygus</i> | Red   | 44.504979  | -123.5510790 | USA: Oregon        | 2015-06-10 | worker |
| GENO  | BmelR097   | <i>melanopygus</i> | Red   | 44.504979  | -123.5510790 | USA: Oregon        | 2015-06-10 | worker |
| GENO  | BmelR098   | <i>melanopygus</i> | Red   | 47.322326  | -122.3972930 | USA:<br>Washington | 2015-06-12 | worker |
| GENO  | BmelR099   | <i>melanopygus</i> | Red   | 45.30289   | -121.7936800 | USA: Oregon        | 2015-07-18 | male   |
| GENO  | BmelR100   | <i>melanopygus</i> | Red   | 44.0518139 | -124.1095361 | USA: Oregon        | 2014-06-10 | male   |
| GENO  | BmelR101   | <i>melanopygus</i> | Red   | 43.9563833 | -124.1371056 | USA: Oregon        | 2014-06-09 | male   |
| GENO  | BmelR102   | <i>melanopygus</i> | Red   | 43.6582111 | -124.1886111 | USA: Oregon        | 2013-06-15 | male   |
| GENO  | BmelR103   | <i>melanopygus</i> | Red   | 43.9556444 | -124.1387944 | USA: Oregon        | 2014-03-04 | queen  |
| GENO  | BmelR104   | <i>melanopygus</i> | Red   | 43.9556444 | -124.1387944 | USA: Oregon        | 2014-03-04 | queen  |
| GENO  | BmelR105   | <i>melanopygus</i> | Red   | 42.1065111 | -124.3466306 | USA: Oregon        | 2013-06-17 | male   |
| GENO  | BmelR107   | <i>melanopygus</i> | Red   | 43.6582111 | -124.1886111 | USA: Oregon        | 2013-06-19 | male   |
| GENO  | BmelR108   | <i>melanopygus</i> | Red   | 43.095433  | -124.4302800 | USA: Oregon        | 2015-06-07 | male   |
| GENO  | BmelR109   | <i>melanopygus</i> | Red   | 43.6582111 | -124.1886111 | USA: Oregon        | 2013-06-19 | male   |
| GENO  | BmelR110   | <i>melanopygus</i> | Red   | 42.1065111 | -124.3466306 | USA: Oregon        | 2013-06-17 | male   |
| GENO  | BmelR111   | <i>melanopygus</i> | Red   | 43.6741    | -124.1676194 | USA: Oregon        | 2013-06-15 | male   |
| GENO  | BmelR112   | <i>melanopygus</i> | Red   | 43.6582111 | -124.1886111 | USA: Oregon        | 2013-06-15 | male   |
| GENO  | BmelR113   | <i>melanopygus</i> | Red   | 43.812164  | -124.1589970 | USA: Oregon        | 2013-06-16 | male   |
| GENO  | BmelR114   | <i>melanopygus</i> | Red   | 44.504979  | -123.5510790 | USA: Oregon        | 2015-06-10 | worker |
| GENO  | BmelR115   | <i>melanopygus</i> | Red   | 43.9556444 | -124.1387944 | USA: Oregon        | 2014-03-04 | queen  |
| GENO  | BmelR116   | <i>melanopygus</i> | Red   | 44.0518139 | -124.1095361 | USA: Oregon        | 2014-06-10 | male   |
| GENO  | BmelR117   | <i>melanopygus</i> | Red   | 43.956923  | -124.1411510 | USA: Oregon        | 2015-02-19 | queen  |
| GENO  | BmelR118   | <i>melanopygus</i> | Red   | 43.9561167 | -124.1374444 | USA: Oregon        | 2014-06-09 | male   |
| GENO  | BmelR119   | <i>melanopygus</i> | Red   | 43.6582111 | -124.1886111 | USA: Oregon        | 2013-06-19 | male   |
| GENO  | BmelR120   | <i>melanopygus</i> | Red   | 43.956923  | -124.1411510 | USA: Oregon        | 2015-02-19 | queen  |
| GENO  | BmelR121   | <i>melanopygus</i> | Red   | 43.956923  | -124.1411510 | USA: Oregon        | 2015-02-19 | queen  |
| GENO  | BmelR140   | <i>melanopygus</i> | Red   | 42.081689  | -122.706948  | USA: Oregon        | 2016-05-28 | male   |
| GENO  | BmelR141   | <i>melanopygus</i> | Red   | 43.035102  | -124.0774220 | USA: Oregon        | 2016-05-29 | male   |
| GENO  | BmelR142   | <i>melanopygus</i> | Red   | 42.687131  | -124.437234  | USA: Oregon        | 2016-05-25 | male   |
| GENO  | BmelR143   | <i>melanopygus</i> | Red   | 41.796994  | -124.0816120 | California         | 2016-05-27 | male   |
| GENO  | BmelR200   | <i>melanopygus</i> | Red   | 43.01821   | -109.75566   | USA:<br>Wyoming    | 2016-08-10 | male   |
| GENO  | BmelR201   | <i>melanopygus</i> | Red   | 40.84828   | -109.645073  | USA: Utah          | 2016-08-10 | male   |
| GENO  | BmelRInt01 | <i>melanopygus</i> | Red   | 42.081689  | -122.706948  | USA: Oregon        | 2016-05-28 | worker |
| GENO  | BmelRInt02 | <i>melanopygus</i> | Red   | 43.036851  | -124.071454  | USA: Oregon        | 2016-05-29 | queen  |
| GENO  | BmelRInt03 | <i>melanopygus</i> | Red   | 42.687131  | -124.437234  | USA: Oregon        | 2016-05-25 | worker |

| STUDY | SAMPLE ID   | SPECIES                              | T2-T3 |            | LONGITUDE    | COUNTRY:             | DATE       | SEX/   |
|-------|-------------|--------------------------------------|-------|------------|--------------|----------------------|------------|--------|
|       |             |                                      | COLOR | LATITUDE   |              |                      |            |        |
| GENO  | BmelRInt04  | <i>melanopygus</i>                   | Red   | 41.796994  | -124.0816120 | USA:<br>California   | 2016-05-27 | male   |
| GENO  | BmelROTM042 | <i>melanopygus</i>                   | Red   | 42.0649176 | -124.3026239 | USA: Oregon          | 2016-05-27 | male   |
| GENO  | BmelROTM048 | <i>melanopygus</i>                   | Red   | 42.100447  | -124.3470295 | USA: Oregon          | 2016-05-27 | male   |
| GENO  | BmelROTM052 | <i>melanopygus</i>                   | Red   | 42.2847724 | -124.4070977 | USA: Oregon          | 2016-05-25 | male   |
| GENO  | BmelROTM052 | <i>melanopygus</i>                   | Red   | 42.687131  | -124.437234  | USA: Oregon          | 2016-05-25 | male   |
| GENO  | BmelROTM053 | <i>melanopygus</i>                   | Red   | 44.1726266 | -122.9500286 | USA: Oregon          | 2016-05-24 | male   |
| GENO  | BmelROTM105 | <i>melanopygus</i>                   | Red   | 42.081689  | -122.706948  | USA: Oregon          | 2016-05-29 | male   |
| GENO  | BmelB050    | <i>mixtus</i>                        | Black | 44.0518139 | -124.1095361 | USA: Oregon          | 2014-06-10 | male   |
| GENO  | BmelB065    | <i>mixtus</i>                        | Black | 45.268     | -121.738     | USA: Oregon          | 2015-06-11 | worker |
| GENO  | sylB        | <i>sylvicola</i>                     | Black | 46.76846   | -121.73096   | USA:<br>Washington   | 2015-07-19 | male   |
| GENO  | sylR        | <i>sylvicola</i>                     | Red   | 46.76846   | -121.73096   | USA:<br>Washington   | 2015-07-19 | male   |
| GENO  | tern        | <i>ternarius</i>                     | Red   | 40.7705481 | -77.7574485  | USA:<br>Pennsylvania | 2015-06-29 | worker |
| GENO  | vos         | <i>vosnesenskii</i>                  | Black | 41.34678   | -122.2414300 | USA:<br>California   | 2015-07-15 | male   |
| GENO  | BIFA95R05   | <i>bifarius</i>                      | Red   | 40.72609   | -109.46854   | USA: Utah            | 2016-08-10 | male   |
| GENO  | BIF019      | <i>bifarius</i><br><i>nearcticus</i> | Black | 42.2567    | -122.469     | USA: Oregon          | 2016-04-12 | queen  |
| GENO  | BIF209      | <i>bifarius</i><br><i>nearcticus</i> | Red   | 41.789995  | -111.7734059 | USA: Utah            | 2016-04    | queen  |
| GENO  | BIFA95R04   | <i>bifarius</i><br><i>nearcticus</i> | Red   | 40.81215   | -109.46517   | USA: Utah            | 2016-08-10 | male   |
| GENO  | Bimac       | <i>bimaculatus</i>                   | Black | 40.730995  | -77.883116   | USA:<br>Pennsylvania | 2017-08-01 | male   |
| GENO  | EPHIP66     | <i>ephippiatus</i>                   | Black | 16.7332939 | -92.6722174  | Mexico:<br>Chiapas   | 2011-05-09 | male   |
| GENO  | EPHIP68     | <i>ephippiatus</i>                   | Red   | 16.7332939 | -92.6722174  | Mexico:<br>Chiapas   | 2011-05-09 | male   |
| GENO  | hunt        | <i>huntii</i>                        | Red   |            |              | USA: Utah            | 2016       | worker |

**Table S3. Primers used for genotyping<sup>†</sup>.**

| Primer Name | Forward (5'-3')      | Reverse (5'-3')      | ~Size (bp) |
|-------------|----------------------|----------------------|------------|
| Pre-1       | CCAGTCTTCCGTTTCTTCGT | CGCTTTTGCAATTTTGTTGT | 340        |
| AbdB1       | CACGAACTCGCGATAGACAA | CGCCACGTCGGTAATAAAGT | 1440       |
| 1to2_2      | CCGTAGCTGTTACCGAACAA | GGGCTGACTTTCAACCAAAT | 1440       |
| 1to2_3      | TTCACGCGATAATCATCCAA | AAGATCGCGCGAAAAAGTTA | 640        |
| 1to2_6      | CCGAAACATCTTCCTCCTCT | AAAATCTCCGATTGCTTGGT | 655        |
| AbdB2       | CGAAGCGATTGCAAACAGTA | GATGGAACGGTTGTCTTCGT | 710        |
| 1to2_K      | ACGGGATCAGGAAACAAAAG | CGATGAAAGTCTGCTTCTCG | 1505       |
| 1to2_L      | GATTCCGTCGTTTTTCTGGT | CGCTTGTAAGTTCGCGATAA | 310        |
| 2to3_4      | CACACGGTCCAATTCCTTA  | GCCAATTAACCCTTTGTTCC | 710        |

|          |                       |                       |      |
|----------|-----------------------|-----------------------|------|
| AbdB3    | CCCGATCTTCTCGGATGTAA  | TAAGTGCATAGGCACGCAAC  | 770  |
| 3to4_1   | AAGTTAACGTTGCGTGCCTA  | TGGCCTTTTCAGTTTCTGTG  | 840  |
| 3to4_2   | GGTCGATGTCGCAATTAATA  | TCTCTTTCGCGATGTTTCAT  | 400  |
| AbdB4    | ACGCGAGTCAGACTTTCCAT  | GCAAAAATTCTTCCGCACAT  | 740  |
| 4to5_C   | CAACCCCTTCGCTATTTTGT  | ATCGCGTAGTACACCATCCA  | 1240 |
| 4to5_5   | AAGAACACTCGTTGCCGATA  | GGAACGAGACGAGGAACTT   | 1020 |
| 4to5_D   | GCTGGTTCGCGTGAAATA    | TTGCACGAGTTCCTCTGT    | 740  |
| 45DRinv_ | ACAGAGAGGAACTCGTGCAA  | TTGTACGTGTGTGGGTTTCGT | 600  |
| 4to5_EH  | ACGAACCCACACACGTACAA  | TAACGTTTTCCACGGAGGAG  | 1410 |
| 4to5_FI  | CGTTTTTATCGCGTCGATTT  | GAGTGGCAACATGCGTCTTA  | 1880 |
| 4to5_G   | TCGGTAAAGTAGGATGCGGTA | CCATCGGTGGCTTACAGTTT  | 1505 |
| 45GRinv_ | AAACTGTAAGCCACCGATGG  | TTGAACATTCGCGTGCTGAC  | 430  |
| AbdB5    | GTCAGCACGCGAATGTTCAA  | TGTTTCGAGAGTGGGGAACG  | 695  |
| 5to6_J   | TCGTCGTCGGATGACTGTAT  | TGGAGATAGCGACATTGAGC  | 475  |
| AbdB6    | AGGATGATCTCGCGTTCAGG  | CAACCTCAAACGCCTCTGC   | 160  |

†All primers were run at (51-52°C, 30 sec for annealing, 72°C, 30-60 sec for elongation).

**Table S4. Primers used for quantitative PCR<sup>‡</sup>.**

| Primer name | Forward (5'-3')         | Reverse (5'-3')        |
|-------------|-------------------------|------------------------|
| α-tubulin   | GGAGGAGGTGATGACAGTTT    | AACCTCGTCGACTACTGTTG   |
| Rps-5       | GTCCCATAGTTGAACGCCTTAC  | GCCGTCACAAGAACCTGTAAA  |
| ef1-α       | CCGACAAGGCTCTTCGTTTA    | ATGCCTGGCTTCAGAATACC   |
| GADPH       | GCTGGAGCTGAATATGTTGTAGA | CCACCTTCAAATGAGCAGA    |
| v-ATPase    | GGCAATCGTATCAACAGTCTCA  | TGCATCTCGAACACTAGCATC  |
| abd-A       | GACATCATGCCAACCACTACCA  | TTCGGCCCGCACACGAC      |
| Abd-B       | CCACCTCCAGTGATGTGG      | CAGAGGGTTCGAGCTTCC     |
| Ubx         | CGGTAGCGGTAACCATAACAA   | CCAGGAGTGTCATGTCAAGTAG |

‡Primers below were designed for this study by comparing *B. impatiens* (GenBank Assembly GCA\_000188105.2, BIMP\_2.0) (1) and *B. melanopygus* genomic sequences and selecting primers that were conserved across both species. qPCR reaction: 1µl of first strand cDNA diluted 5X from 20µl of initial reaction volume, 0.3µmol of each primer, 5ul PowerSYBR<sup>®</sup> Green PCR master mix (Applied Biosystems), and nuclease-free water to 10µl run in a 384-well plate amplified for 40 cycles on an ABI 7900 real-time PCR detection system (50°C for 2 min, 95°C for 10 min, followed by 40 cycles of two step PCR reaction with denaturation at 95°C for 15 s and annealing extension at 60°C for 1 min).

## SI References

1. Sadd BM, *et al.* (2015) The genomes of two key bumblebee species with primitive eusocial organization. *Genome Biol* 16(1):76.
2. Kyrchanova O, *et al.* (2015) The boundary paradox in the bithorax complex. *Mech Dev* 138:122-132.
3. Rahman, S.R. *et al.* (2019). Data from: A homeotic shift late in development drives mimetic color variation in a bumble bee. Dryad Digital Repository. doi:10.5061/dryad.3v6f25v
4. Tian L, Hines HM (2018) Morphological characterization and staging of bumble bee pupae. *PeerJ* 6:e6089.
5. DePristo MA, *et al.* (2011) A framework for variation discovery and genotyping using next-generation DNA sequencing data. *Nature Genetics* 43:491.
6. Danecek P, *et al.* (2011) The variant call format and VCFtools. *Bioinformatics* 27(15):2156-2158.
